# Supplementary material for: GlycoMinestruct: a new bioinformatics tool for highly accurate mapping of the human N-linked and O-linked glycoproteomes by incorporating structural features
Source: PubMed Central journal article supplement (PMC5052564; doi:10.1038/srep34595), 2016-10-06
Supplement: srep34595-s1.pdf [file srep34595-s1.pdf]

## Supplementary materials

### ***GlycoMine<sup>struct</sup>*: a new bioinformatics tool for highly accurate mapping of the human N-linked and O-linked glycoproteomes by incorporating structural features**

Fuyi Li<sup>1,2,†</sup>, Chen Li<sup>2,†</sup>, Jerico Revote<sup>3</sup>, Yang Zhang<sup>1,\*</sup>, Geoffrey I. Webb<sup>4</sup>, Jian Li<sup>6</sup>, Jiangning Song<sup>2,4,5,\*</sup> and Trevor Lithgow<sup>6,\*</sup>

<sup>1</sup>College of Information Engineering, Northwest A&F University, Yangling 712100, China, <sup>2</sup>Infection and Immunity Program, Biomedicine Discovery Institute and Department of Biochemistry and Molecular Biology, Monash University, Melbourne, VIC 3800, Australia, <sup>3</sup>Monash Bioinformatics Platform, Monash University, Melbourne, VIC 3800, <sup>4</sup>Monash Centre for Data Science, Faculty of Information Technology, Monash University, Melbourne, VIC 3800, Australia, <sup>5</sup>National Engineering Laboratory for Industrial Enzymes and Key Laboratory of Systems Microbial Biotechnology, Tianjin Institute of Industrial Biotechnology, Chinese Academy of Sciences, Tianjin 300308, China and <sup>6</sup>Infection and Immunity Program, Biomedicine Discovery Institute and Department of Microbiology, Monash University, Melbourne, VIC 3800, Australia

\*To whom correspondence should be addressed: [zhangyang@nwsuaf.edu.cn](mailto:zhangyang@nwsuaf.edu.cn); [Jiangning.Song@monash.edu](mailto:Jiangning.Song@monash.edu) and [Trevor.Lithgow@monash.edu](mailto:Trevor.Lithgow@monash.edu).

†The two authors contributed equally to this work.

### **Supplemental methods**

In this study, we used six measures, including Sensitivity (or true positive rate (TPR)), Specificity, Precision (PRE), Accuracy (ACC), Mathew's Correlation Coefficient (MCC), and the area under the curve (AUC) to evaluate the prediction performance of *GlycoMine<sup>struct</sup>*. The first five measures are defined as follows:

Sensitivity:

$$\text{Sensitivity} = \text{TP}/(\text{TP} + \text{FN}),$$

Specificity:

$$\text{Specificity} = \text{TN}/(\text{TN} + \text{FP}),$$

Precision:

$$\text{Precision} = \text{TP}/(\text{TP} + \text{FP}),$$

Accuracy:

$$\text{Accuracy} = \frac{\text{TP} + \text{TN}}{\text{TP} + \text{TN} + \text{FP} + \text{FN}}$$

Mathew's Correlation Coefficient (MCC):

$$\text{MCC} = \frac{\text{TP} \times \text{TN} - \text{FP} \times \text{FN}}{\sqrt{(\text{TP} + \text{FP})(\text{TP} + \text{FN})(\text{TN} + \text{FP})(\text{TN} + \text{FN})}}$$

where  $TP$ ,  $TN$ ,  $FP$  and  $FN$  represents the numbers of true positives, true negatives, false positives and false negatives, respectively.

## Supplemental results

### **Analysis of significantly enriched Gene Ontology (GO) terms for N- and O-glycosylated proteins**

We collected GO terms for all the N- and O-glycosylated proteins in our benchmark dataset and conducted analyses of significantly enriched GO terms for both types of glycosylated proteins. The GO term annotations were extracted from the UniProt database<sup>1</sup> using the identifier for each protein. For statistical analysis, for each type of glycosylation, we prepared two datasets, i.e. the positive dataset (with glycosylated proteins) and the background set (from human proteins). We performed the two-side hypergeometric test to find significantly enriched GO terms from the positive set compared with the background set. The results for N- and O-glycosylation are respectively shown in **Supplementary Tables S4 and S5**. The GO term annotations involve three subcategories, namely cellular component (CC), molecular function (MF) and biological process (BP). For CC, it is clear from **Supplementary Tables S4 and S5** that O-glycosylated proteins possess more GO terms (110 GO terms) compared with N-glycosylated proteins (17 GO terms). 17 significantly enrich GO terms for N-glycosylated proteins include “Endoplasmic reticulum”, “Cytosol”, “Mitochondrion”, “Mitochondrial matrix”, “Centrosome”, “Spindle pole”, “Golgi apparatus”, “Membrane”, “Cell surface”, “Extracellular region”, “Integral component of membrane”, “Lamellipodium”, “Extracellular space”, “Endoplasmic reticulum membrane”, “Endolysosome membrane”, “Beta-catenin destruction complex”, and “Endolysosome lumen”. While for O-linked glycosylation, the top ten significantly enriched GO terms are “ATP binding”, “Proteolysis”, “Negative regulation of apoptotic process”, “Glycolytic process”, and “Cellular response to lipopolysaccharide”.

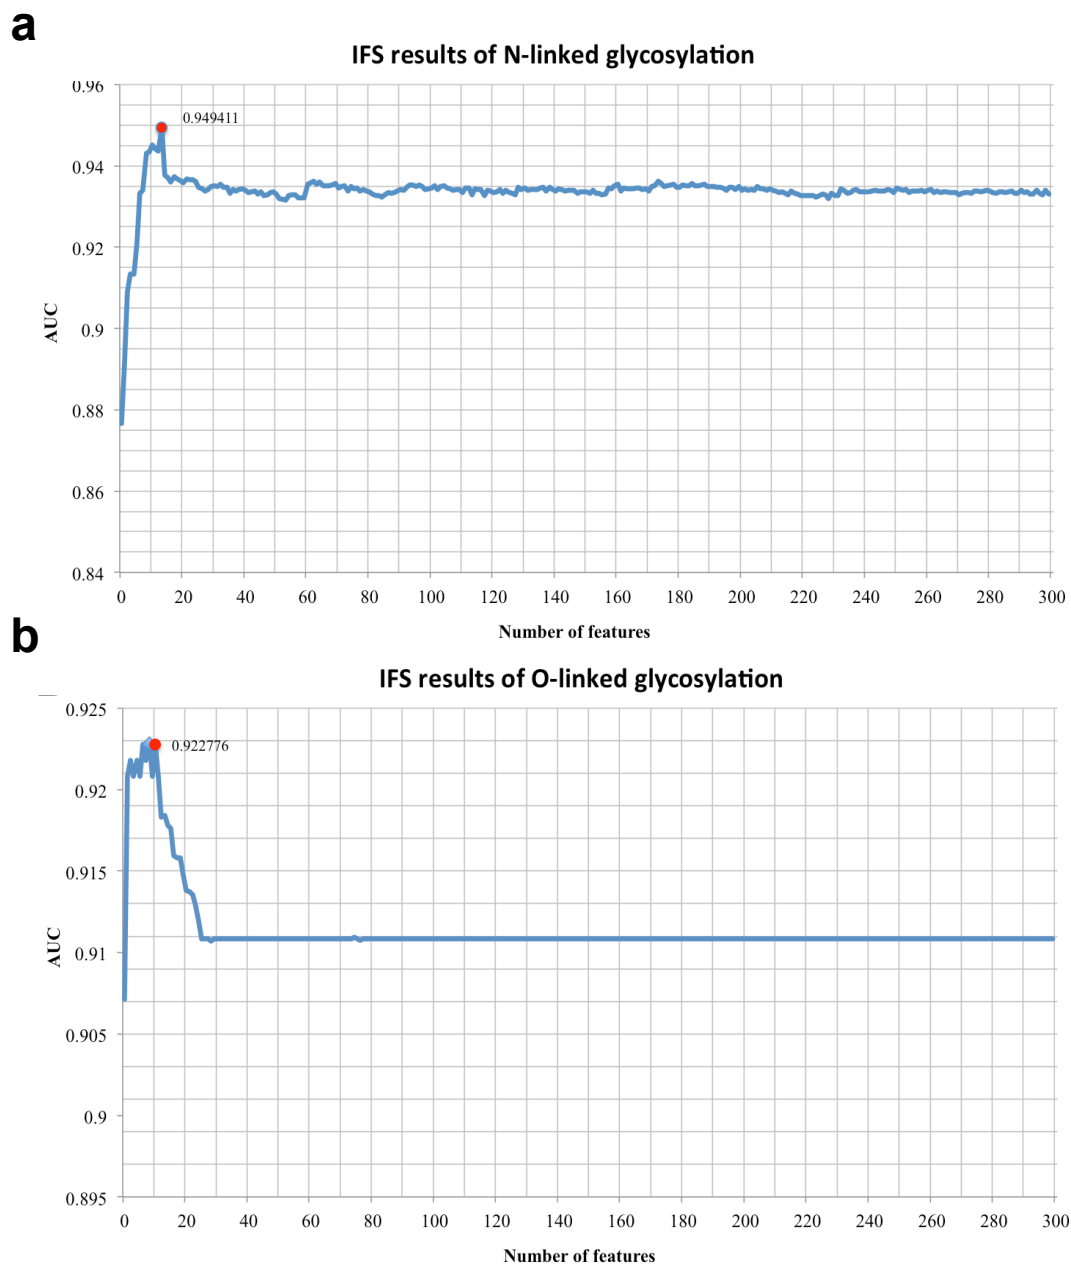

**Supplementary Figure S1. IFS curves for the prediction of (a) N- and (b) O-linked glycosylation sites. The values highlighted in the graph correspond to the highest AUC scores obtained by IFS for N- and O-linked glycosylation, respectively.**

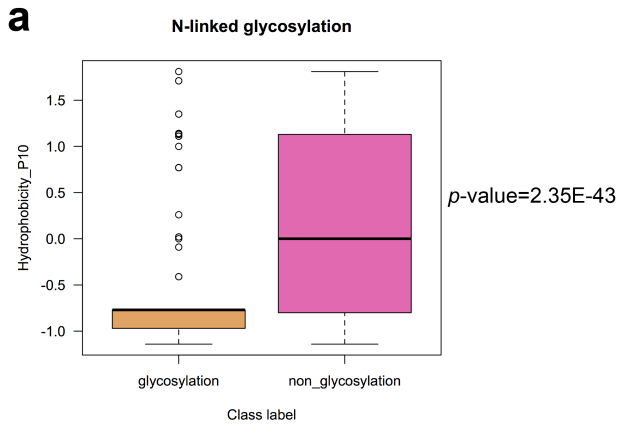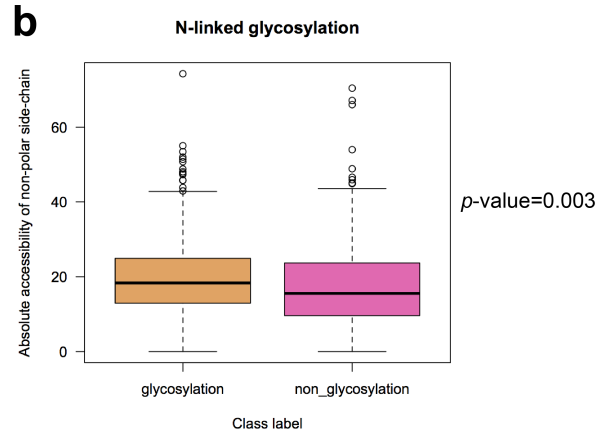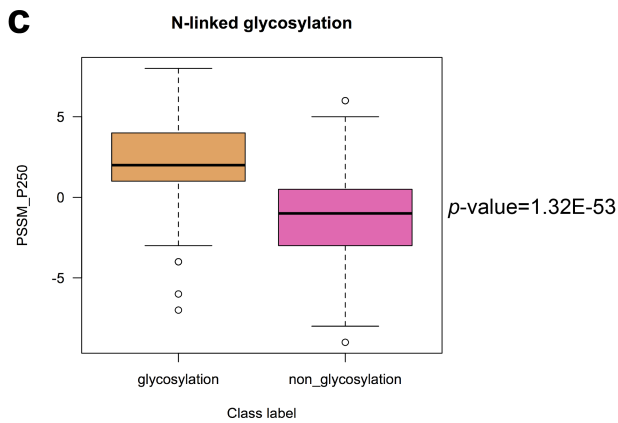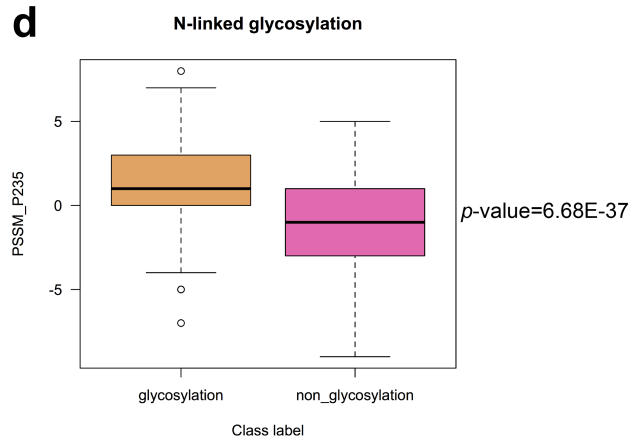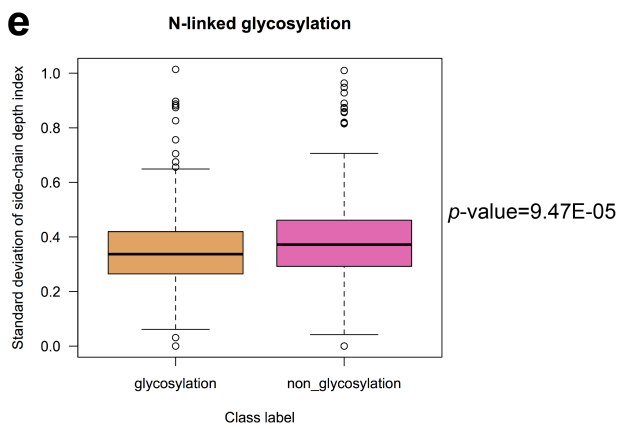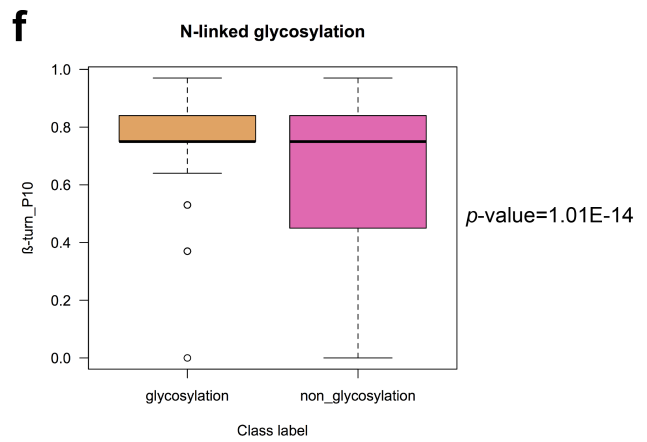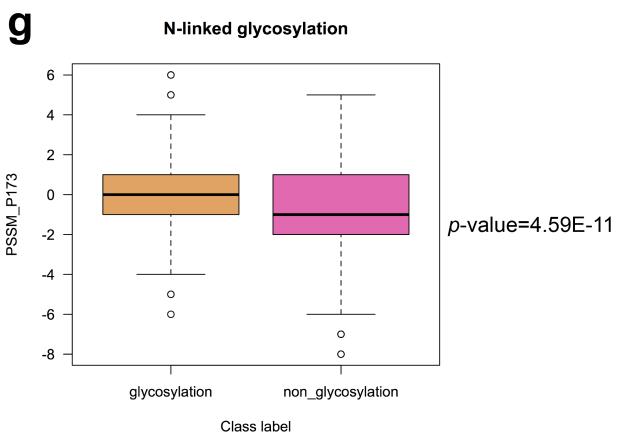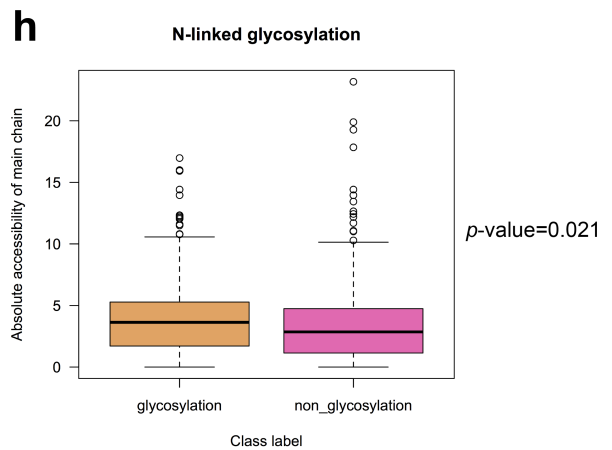

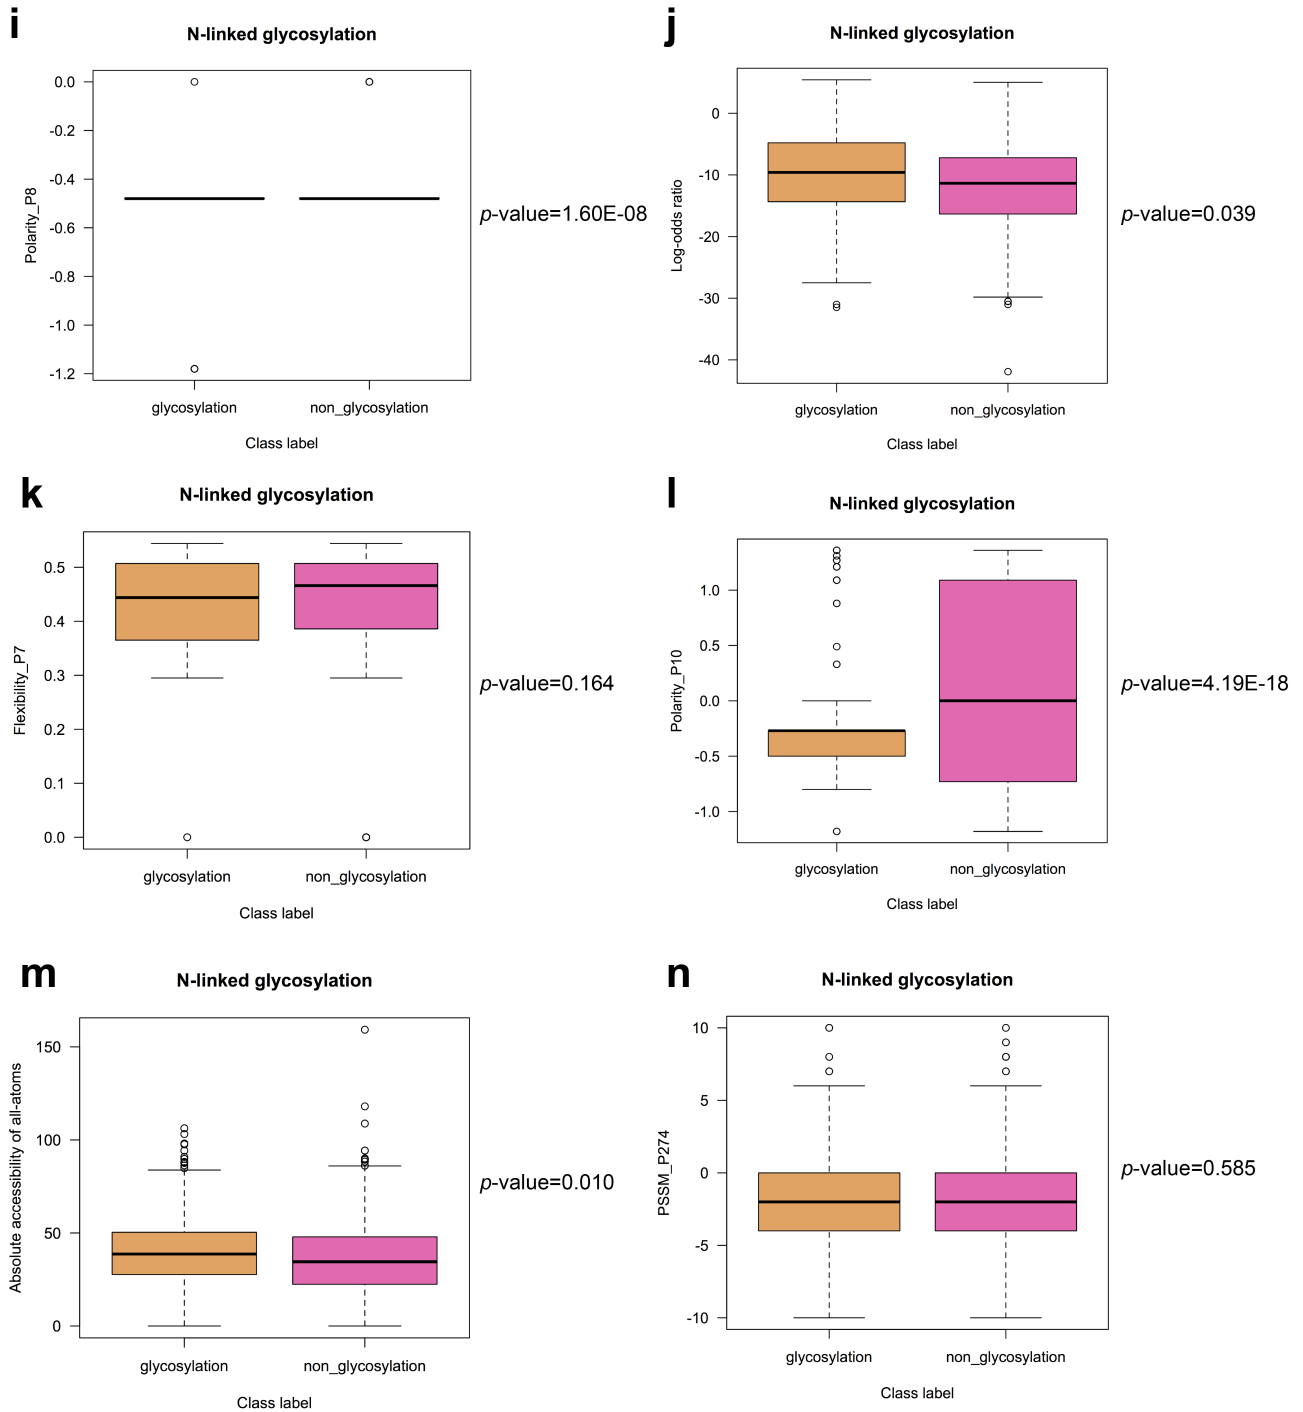

**Supplementary Figure S2. Boxplots showing the significant difference in feature value distributions of the optimal sequence and structural features listed in Table 1 for N-linked glycosylation prediction.**

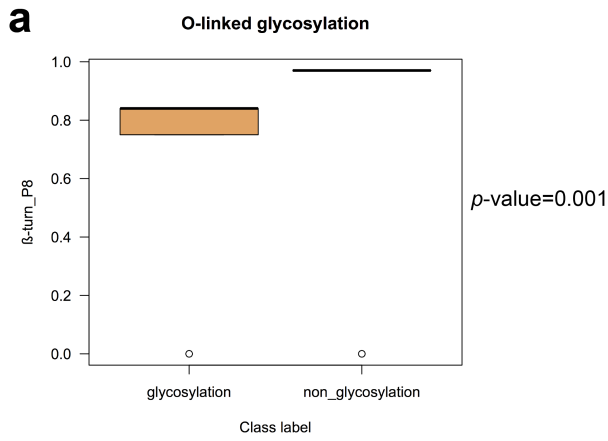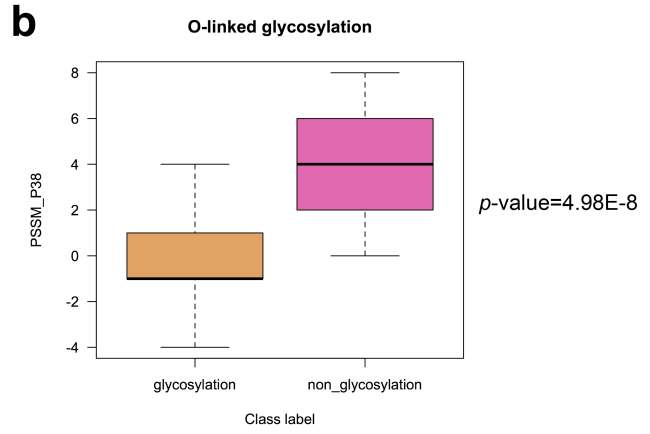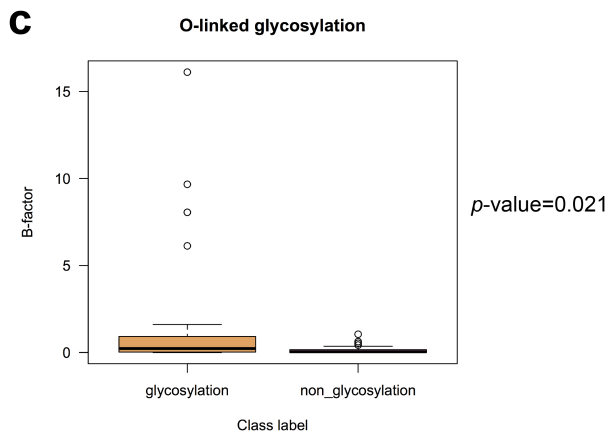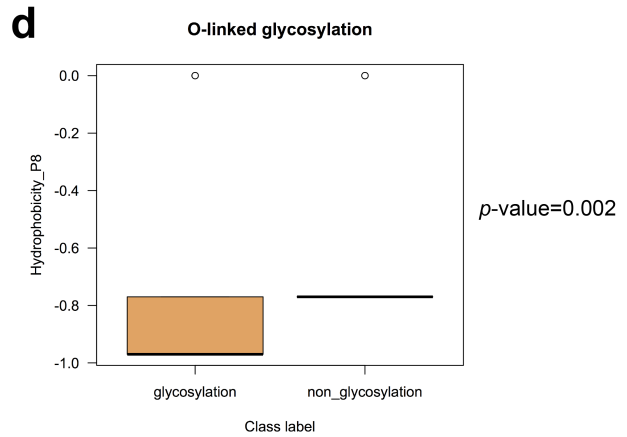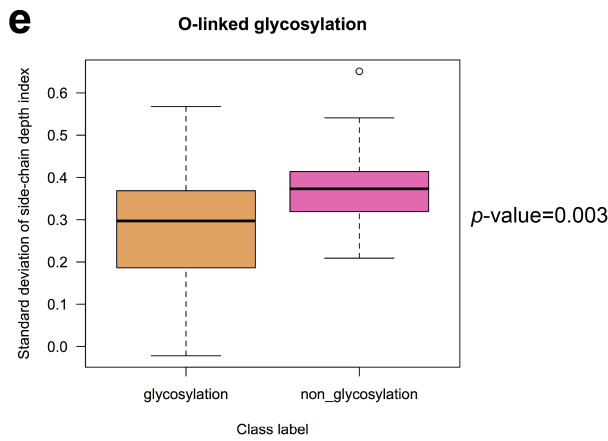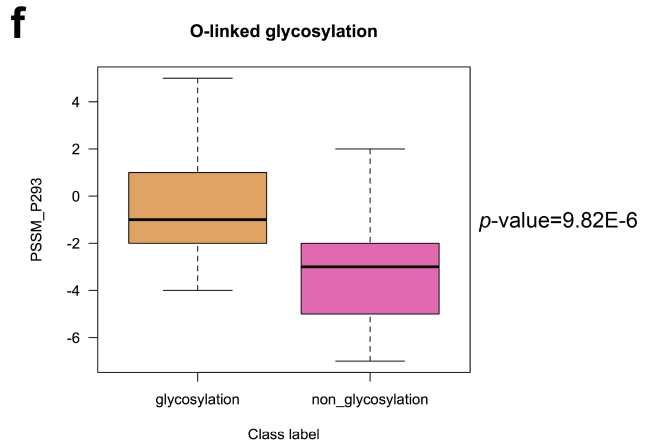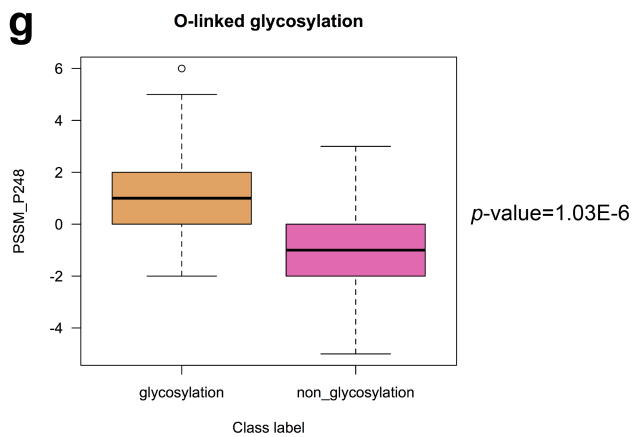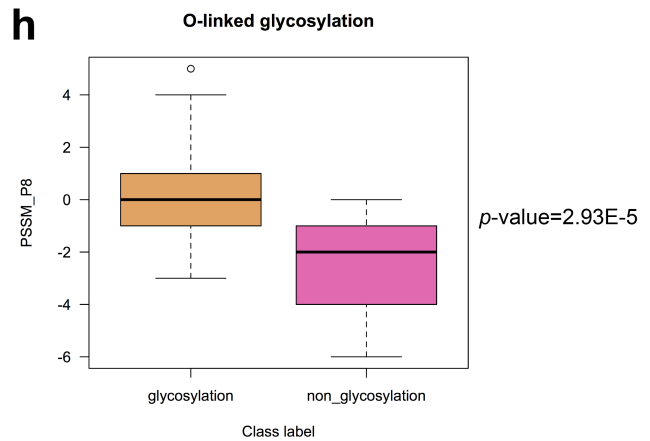

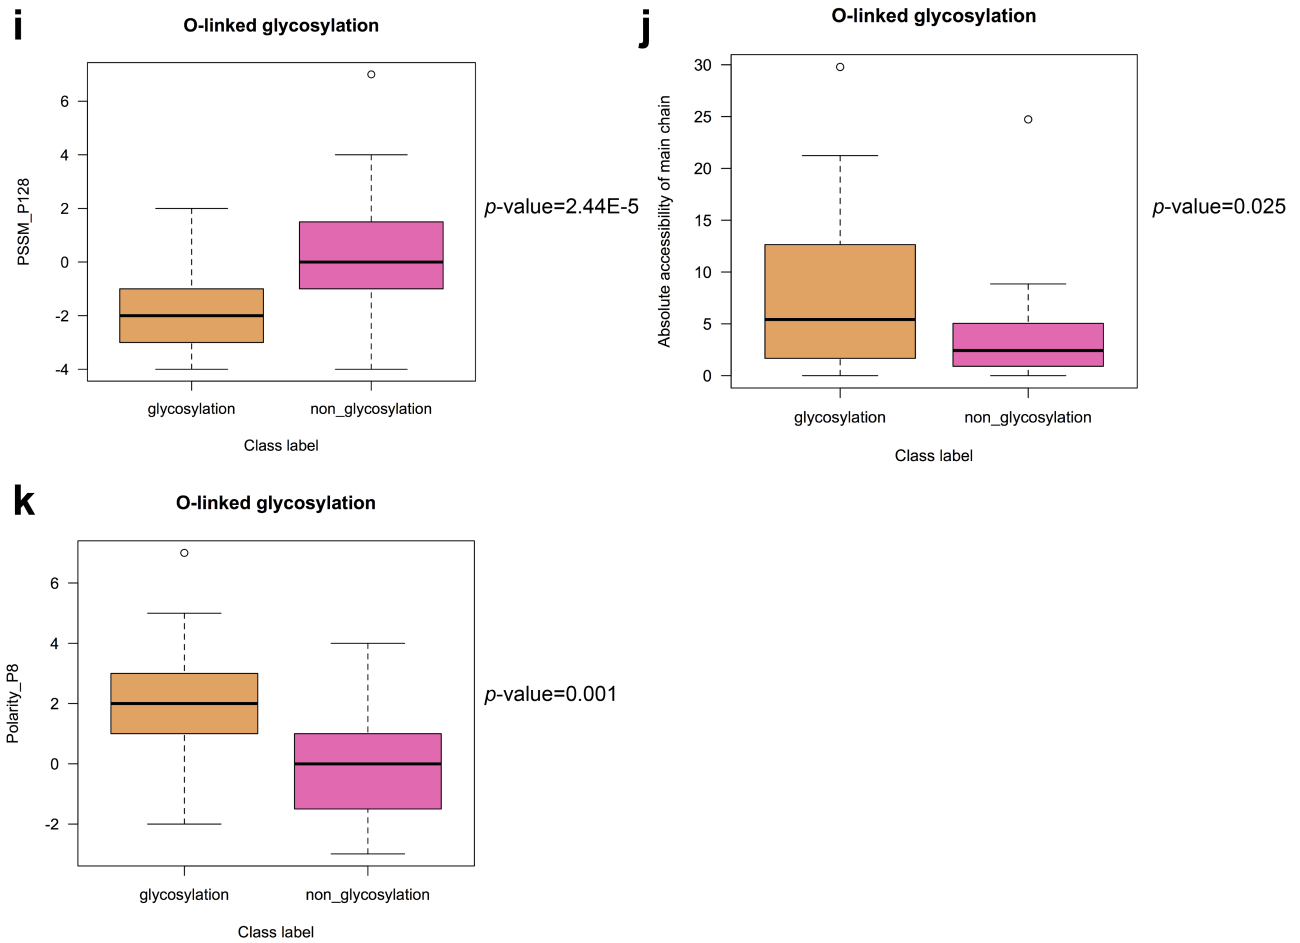

**Supplementary Figure S3. Boxplots showing significant difference in feature value distributions of the optimal sequence and structural features listed in Table 2 for O-linked glycosylation prediction.**



**a**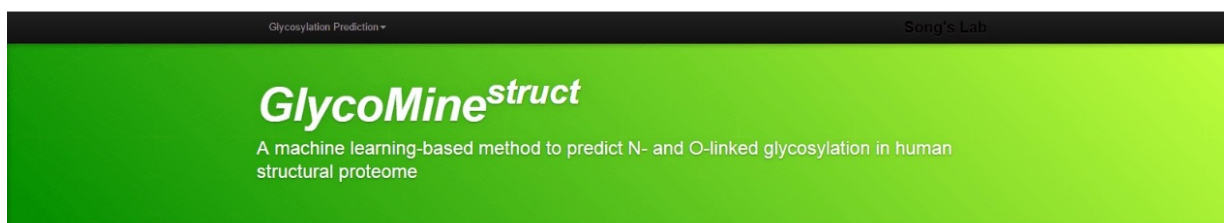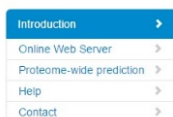

## Introduction

Glycosylation is a ubiquitous type of protein post-translational modification (PTM) in eukaryotic cells, which plays vital roles in various biological processes such as cellular communication, ligand recognition, and subcellular recognition. It is estimated that >50% of the entire human proteome is glycosylated.

We present a novel bioinformatics tool called *GlycoMine<sup>struct</sup>*, which is a comprehensive tool for the systematic *in silico* identification of N- and O-linked glycosylation sites in the human structural proteome. *GlycoMine<sup>struct</sup>* was developed using the random forest algorithm and evaluated based on a well-prepared up-to-date benchmark dataset that encompasses all three types of glycosylation sites, which was curated from multiple public resources.

## Online Web Server

**b**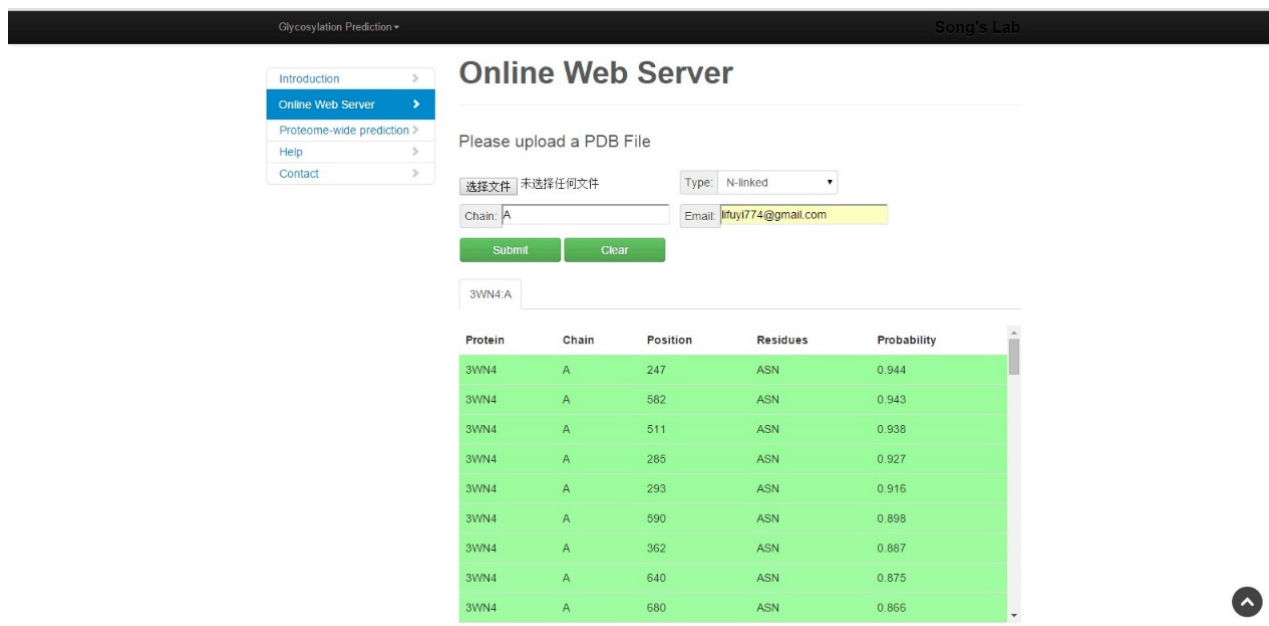

**Supplementary Figure S4. Screenshots of *GlycoMine<sup>struct</sup>* web server. (a) The user interface and (b) Display of the prediction output.**

**Supplementary Table S1. The prediction performance of N- and O-linked glycosylation sites based on 5-fold cross-validation and independent tests.** The performance was evaluated using six measures including AUC, MCC, ACC, Sensitivity, Specificity, and Precision.

|                                 |                    |          | <b>AUC</b> | <b>MCC</b> | <b>ACC</b> | <b>Sensitivity</b> | <b>Specificity</b> | <b>Precision</b> |
|---------------------------------|--------------------|----------|------------|------------|------------|--------------------|--------------------|------------------|
| <b>All OFS features</b>         | <b>Benchmark</b>   | N-linked | 0.949      | 0.838      | 0.919      | 0.936              | 0.901              | 0.912            |
|                                 |                    | O-linked | 0.923      | 0.814      | 0.906      | 0.871              | 0.939              | 0.931            |
|                                 | <b>Independent</b> | N-linked | 0.941      | 0.830      | 0.912      | 0.972              | 0.853              | 0.867            |
|                                 |                    | O-linked | 0.922      | 0.805      | 0.895      | 0.778              | 0.979              | 0.972            |
| <b>Structural features only</b> | <b>Benchmark</b>   | N-linked | 0.911      | 0.734      | 0.865      | 0.823              | 0.911              | 0.910            |
|                                 |                    | O-linked | 0.836      | 0.660      | 0.828      | 0.871              | 0.788              | 0.794            |
| <b>Sequence features only</b>   | <b>Benchmark</b>   | N-linked | 0.880      | 0.695      | 0.846      | 0.811              | 0.883              | 0.884            |
|                                 |                    | O-linked | 0.814      | 0.547      | 0.766      | 0.871              | 0.667              | 0.711            |
| <b>NGlycPred</b>                | <b>Independent</b> | N-linked | 0.804      | 0.685      | 0.840      | 0.785              | 0.896              | 0.884            |

**Supplementary Table S2. Statistical summary of the proteome-wide prediction of N- and O-linked glycosylation sites at the 99% specificity level.** The prediction was performed for the whole human structural proteome with a total of 20538 proteins.

| <b>Glycosylation Type</b> | <b>Number of predicted glycosylated proteins</b> | <b>Number of predicted glycosylation sites</b> |
|---------------------------|--------------------------------------------------|------------------------------------------------|
| N-linked                  | 3386                                             | 4996                                           |
| O-linked                  | 5298                                             | 10529                                          |

**Supplementary Table S3. Lists of all initial features explored in this study. (a)** Sequence-derived features and **(b)** Structural features.

**(a)**

| Feature type               | Description                                                                         | Software               | Number of features |
|----------------------------|-------------------------------------------------------------------------------------|------------------------|--------------------|
| AAindex                    | The hydrophobicity score, flexibility score, polarity score and $\beta$ -turn score | AAindex <sup>2</sup>   | 4×15=60            |
| Physicochemical properties | 14 physicochemical properties                                                       | BioJava <sup>3</sup>   | 14                 |
| PSSMs                      | Position-specific scoring matrices                                                  | PSI-BLAST <sup>4</sup> | 20×15=300          |
| Residue conversation score | Residue conversation                                                                | PSI-BLAST <sup>4</sup> | 1×15=15            |

**(b)**

| Feature type          | Description                                                                                                                           | Software               | Number of features |
|-----------------------|---------------------------------------------------------------------------------------------------------------------------------------|------------------------|--------------------|
| Surface accessibility | All-atoms, total-side, main-chain, non-polar and all-polar accessibilities                                                            | NACCESS <sup>5</sup>   | 5                  |
| Secondary structure   | ACC: the number of water molecules in contact with corresponding residue; PHI and PSI: two IUPAC peptide backbone torsion angles.     | DSSP <sup>6</sup>      | 3                  |
| Log-odds ratio        | Log-odds ratio is a statistical feature                                                                                               | DiscoTope <sup>7</sup> | 1                  |
| Depth Index           | The average depth, standard deviation of depth index, side-chain average depth index and standard deviation of side-chain depth index | PSAIA <sup>8</sup>     | 4                  |
| B-factor              | The average B-factor of all the atoms in this residue                                                                                 | PDB file <sup>9</sup>  | 1                  |

**Supplementary Table S4. Significantly enriched GO terms for N-linked glycosylated proteins.**

| Type | ID         | Term in the positive | Term in the human proteome | P-value | Term                                       |
|------|------------|----------------------|----------------------------|---------|--------------------------------------------|
| CC   | GO:0005783 | 17                   | 120                        | 1.72E-3 | Endoplasmic reticulum                      |
|      | GO:0005829 | 97                   | 1106                       | 7.07E-4 | Cytosol                                    |
|      | GO:0005739 | 32                   | 271                        | 6.50E-4 | Mitochondrion                              |
|      | GO:0005759 | 13                   | 95                         | 6.86E-3 | Mitochondrial matrix                       |
|      | GO:0005813 | 12                   | 86                         | 7.82E-3 | Centrosome                                 |
|      | GO:0000922 | 6                    | 27                         | 6.56E-3 | Spindle pole                               |
|      | GO:0005794 | 20                   | 176                        | 7.63E-3 | Golgi apparatus                            |
|      | GO:0016020 | 17                   | 122                        | 2.03E-3 | Membrane                                   |
|      | GO:0009986 | 16                   | 132                        | 8.82E-3 | Cell surface                               |
|      | GO:0005576 | 36                   | 322                        | 8.24E-4 | Extracellular region                       |
|      | GO:0016021 | 31                   | 306                        | 6.27E-3 | Integral component of membrane             |
|      | GO:0030027 | 8                    | 47                         | 9.02E-3 | Lamellipodium                              |
|      | GO:0005615 | 33                   | 327                        | 5.35E-3 | Extracellular space                        |
|      | GO:0005789 | 14                   | 109                        | 8.58E-3 | Endoplasmic reticulum membrane             |
|      | GO:0036020 | 2                    | 2                          | 4.62E-3 | Endolysosome membrane                      |
|      | GO:0030877 | 3                    | 7                          | 8.28E-3 | Beta-catenin destruction complex           |
|      | GO:0036021 | 3                    | 4                          | 1.17E-3 | Endolysosome lumen                         |
| MF   | GO:0005524 | 65                   | 537                        | 5.79E-7 | ATP binding                                |
|      | GO:0004674 | 17                   | 129                        | 3.46E-3 | Protein serine/threonine kinase activity   |
|      | GO:0009055 | 12                   | 68                         | 1.28E-3 | Electron carrier activity                  |
|      | GO:0004252 | 10                   | 63                         | 6.24E-3 | Serine-type endopeptidase activity         |
|      | GO:0008201 | 9                    | 55                         | 7.53E-3 | Heparin binding                            |
|      | GO:0008144 | 6                    | 28                         | 7.79E-3 | Drug binding                               |
|      | GO:0005506 | 10                   | 66                         | 8.37E-3 | Iron ion binding                           |
|      | GO:0016887 | 4                    | 13                         | 8.06E-3 | ATPase activity                            |
|      | GO:0004222 | 7                    | 34                         | 5.28E-3 | Metalloendopeptidase activity              |
|      | GO:0004716 | 4                    | 8                          | 1.12E-3 | Receptor signaling protein tyrosine kinase |

|    |            |    |     |         |                                                                                               |
|----|------------|----|-----|---------|-----------------------------------------------------------------------------------------------|
|    |            |    |     |         | activity                                                                                      |
|    | GO:0004197 | 6  | 25  | 4.51E-3 | Cysteine-type endopeptidase activity                                                          |
|    | GO:0005149 | 2  | 2   | 4.62E-3 | Interleukin-1 receptor binding                                                                |
|    | GO:0005536 | 3  | 5   | 2.72E-3 | Glucose binding                                                                               |
|    | GO:0043169 | 5  | 16  | 2.89E-3 | Cation binding                                                                                |
|    | GO:0016812 | 2  | 2   | 4.62E-3 | Hydrolase activity, acting on<br>Carbon-nitrogen (but not peptide) bonds,<br>in cyclic amides |
|    | GO:0008013 | 3  | 6   | 5.07E-3 | Beta-catenin binding                                                                          |
|    | GO:0004029 | 3  | 6   | 5.07E-3 | Aldehyde dehydrogenase (NAD) activity                                                         |
|    | GO:0016303 | 3  | 4   | 1.17E-3 | 1-phosphatidylinositol-3-kinase activity                                                      |
|    | GO:0015038 | 2  | 2   | 4.62E-3 | Glutathione disulfide oxidoreductase<br>activity                                              |
|    | GO:0046934 | 2  | 2   | 4.62E-3 | Phosphatidylinositol-4,5-bisphosphate<br>3-kinase activity                                    |
| BP | GO:0045087 | 26 | 200 | 5.07E-4 | Innate immune response                                                                        |
|    | GO:0043066 | 32 | 212 | 7.23E-6 | Negative regulation of apoptotic process                                                      |
|    | GO:0006508 | 28 | 170 | 5.21E-6 | Proteolysis                                                                                   |
|    | GO:0006006 | 7  | 37  | 8.21E-3 | Glucose metabolic process                                                                     |
|    | GO:0070207 | 4  | 8   | 1.12E-3 | Protein homotrimerization                                                                     |
|    | GO:0044281 | 26 | 198 | 4.38E-4 | Small molecule metabolic process                                                              |
|    | GO:0007409 | 6  | 18  | 7.69E-4 | Axonogenesis                                                                                  |
|    | GO:0046777 | 13 | 94  | 6.34E-3 | Protein autophosphorylation                                                                   |
|    | GO:0002250 | 4  | 11  | 4.28E-3 | Adaptive immune response                                                                      |
|    | GO:0001816 | 4  | 9   | 1.88E-3 | Cytokine production                                                                           |
|    | GO:0071222 | 8  | 29  | 4.27E-4 | Cellular response to lipopolysaccharide                                                       |
|    | GO:0045080 | 3  | 7   | 8.28E-3 | Positive regulation of chemokine<br>biosynthetic process                                      |
|    | GO:0042493 | 16 | 133 | 9.36E-3 | Response to drug                                                                              |
|    | GO:0030168 | 15 | 111 | 4.52E-3 | Platelet activation                                                                           |
|    | GO:0002576 | 9  | 55  | 7.53E-3 | Platelet degranulation                                                                        |
|    | GO:0006935 | 5  | 21  | 9.49E-3 | Chemotaxis                                                                                    |
|    | GO:0071260 | 7  | 33  | 4.50E-3 | Cellular response to mechanical stimulus                                                      |

|            |   |    |         |                                                              |
|------------|---|----|---------|--------------------------------------------------------------|
| GO:0045078 | 3 | 6  | 5.07E-3 | Positive regulation of interferon-gamma biosynthetic process |
| GO:0006096 | 8 | 25 | 1.42E-4 | Glycolytic process                                           |
| GO:0005980 | 3 | 7  | 8.28E-3 | Glycogen catabolic process                                   |
| GO:0046686 | 5 | 14 | 1.52E-3 | Response to cadmium ion                                      |
| GO:0000281 | 3 | 7  | 8.28E-3 | Mitotic cytokinesis                                          |
| GO:0007160 | 7 | 26 | 1.12E-3 | Cell-matrix adhesion                                         |
| GO:0045780 | 3 | 7  | 8.28E-3 | Positive regulation of bone resorption                       |
| GO:0050435 | 3 | 5  | 2.72E-3 | Beta-amyloid metabolic process                               |
| GO:0007040 | 4 | 8  | 1.12E-3 | Lysosome organization                                        |
| GO:0007494 | 2 | 2  | 4.62E-3 | Midgut development                                           |
| GO:0060444 | 4 | 8  | 1.12E-3 | Branching involved in mammary gland duct morphogenesis       |
| GO:0030316 | 4 | 11 | 4.28E-3 | Osteoclast differentiation                                   |
| GO:0033628 | 3 | 7  | 8.28E-3 | Regulation of cell adhesion mediated by integrin             |
| GO:0002437 | 3 | 7  | 8.28E-3 | Inflammatory response to antigenic stimulus                  |
| GO:0032611 | 2 | 2  | 4.62E-3 | Interleukin-1 beta production                                |
| GO:0042346 | 4 | 11 | 4.28E-3 | Positive regulation of NF-kappaB import into nucleus         |
| GO:0003073 | 2 | 2  | 4.62E-3 | Regulation of systemic arterial blood pressure               |
| GO:0030207 | 3 | 5  | 2.72E-3 | Chondroitin sulfate catabolic process                        |
| GO:0045356 | 2 | 2  | 4.62E-3 | Positive regulation of interferon-alpha biosynthetic process |
| GO:0060740 | 3 | 6  | 5.07E-3 | Prostate gland epithelium morphogenesis                      |
| GO:0042733 | 4 | 9  | 1.88E-3 | Embryonic digit morphogenesis                                |
| GO:0061198 | 2 | 2  | 4.62E-3 | Fungiform papilla formation                                  |
| GO:0060789 | 3 | 4  | 1.17E-3 | Hair follicle placode formation                              |
| GO:0010042 | 2 | 2  | 4.62E-3 | Response to manganese ion                                    |
| GO:0071372 | 3 | 5  | 2.72E-3 | Cellular response to follicle-stimulating hormone stimulus   |

|            |   |    |         |                                                                                  |
|------------|---|----|---------|----------------------------------------------------------------------------------|
| GO:0003420 | 2 | 2  | 4.62E-3 | Regulation of growth plate cartilage chondrocyte proliferation                   |
| GO:0070527 | 3 | 4  | 1.17E-3 | Platelet aggregation                                                             |
| GO:0014909 | 3 | 4  | 1.17E-3 | Smooth muscle cell migration                                                     |
| GO:0042117 | 2 | 2  | 4.62E-3 | Monocyte activation                                                              |
| GO:0010641 | 2 | 2  | 4.62E-3 | Positive regulation of platelet-derived growth factor receptor signaling pathway |
| GO:0050927 | 3 | 5  | 2.72E-3 | Positive regulation of positive chemotaxis                                       |
| GO:0035116 | 4 | 11 | 4.28E-3 | Embryonic hindlimb morphogenesis                                                 |
| GO:0032331 | 3 | 6  | 5.07E-3 | Negative regulation of chondrocyte differentiation                               |
| GO:0033146 | 2 | 2  | 4.62E-3 | Regulation of intracellular estrogen receptor signaling pathway                  |
| GO:0050790 | 3 | 4  | 1.17E-3 | Regulation of catalytic activity                                                 |
| GO:0051131 | 2 | 2  | 4.62E-3 | Chaperone-mediated protein complex assembly                                      |
| GO:0019953 | 2 | 2  | 4.62E-3 | Sexual reproduction                                                              |
| GO:0055118 | 2 | 2  | 4.62E-3 | Negative regulation of cardiac muscle contraction                                |
| GO:0048025 | 2 | 2  | 4.62E-3 | Negative regulation of mrna splicing, via spliceosome                            |
| GO:0009966 | 3 | 4  | 1.17E-3 | Regulation of signal transduction<br>Canonical Wnt signaling pathway             |
| GO:0061324 | 2 | 2  | 4.62E-3 | involved in positive regulation of cardiac outflow tract cell proliferation      |
| GO:0003344 | 2 | 2  | 4.62E-3 | Pericardium morphogenesis                                                        |

---



**Supplementary Table S5. Significantly enriched GO terms for O-linked glycosylated proteins.**

| Type | ID         | Term in the positive | Term in the human proteome | P-value  | Term                                                |
|------|------------|----------------------|----------------------------|----------|-----------------------------------------------------|
| CC   | GO:0005783 | 17                   | 120                        | 1.72E-03 | Endoplasmic reticulum                               |
|      | GO:0005829 | 97                   | 1106                       | 7.07E-04 | Cytosol                                             |
|      | GO:0005739 | 32                   | 271                        | 6.50E-04 | Mitochondrion                                       |
|      | GO:0005759 | 13                   | 95                         | 6.86E-03 | Mitochondrial matrix                                |
|      | GO:0000922 | 6                    | 27                         | 6.56E-03 | Spindle pole                                        |
|      | GO:0005794 | 20                   | 176                        | 7.63E-03 | Golgi apparatus                                     |
|      | GO:0016020 | 17                   | 122                        | 2.03E-03 | Membrane                                            |
|      | GO:0009986 | 16                   | 132                        | 8.82E-03 | Cell surface                                        |
|      | GO:0005576 | 36                   | 322                        | 8.24E-04 | Extracellular region                                |
|      | GO:0016021 | 31                   | 306                        | 6.27E-03 | Integral component of membrane                      |
|      | GO:0030027 | 8                    | 47                         | 9.02E-03 | Lamellipodium                                       |
|      | GO:0005615 | 33                   | 327                        | 5.35E-03 | Extracellular space                                 |
|      | GO:0005789 | 14                   | 109                        | 8.58E-03 | Endoplasmic reticulum membrane                      |
|      | GO:0036020 | 2                    | 2                          | 4.62E-03 | Endolysosome membrane                               |
|      | GO:0030877 | 3                    | 7                          | 8.28E-03 | Beta-catenin destruction complex                    |
|      | GO:0036021 | 3                    | 4                          | 1.17E-03 | Endolysosome lumen                                  |
|      | GO:0005524 | 65                   | 537                        | 5.79E-07 | ATP binding                                         |
|      | GO:0004674 | 17                   | 129                        | 3.46E-03 | Protein serine/threonine kinase activity            |
|      | GO:0009055 | 12                   | 68                         | 1.28E-03 | Electron carrier activity                           |
|      | GO:0004252 | 10                   | 63                         | 6.24E-03 | Serine-type endopeptidase activity                  |
|      | GO:0008201 | 9                    | 55                         | 7.53E-03 | Heparin binding                                     |
|      | GO:0008144 | 6                    | 28                         | 7.79E-03 | Drug binding                                        |
|      | GO:0005506 | 10                   | 66                         | 8.37E-03 | Iron ion binding                                    |
|      | GO:0016887 | 4                    | 13                         | 8.06E-03 | Atpase activity                                     |
|      | GO:0004222 | 7                    | 34                         | 5.28E-03 | Metalloendopeptidase activity                       |
|      | GO:0004716 | 4                    | 8                          | 1.12E-03 | Receptor signaling protein tyrosine kinase activity |

|            |    |     |          |                                                                                               |
|------------|----|-----|----------|-----------------------------------------------------------------------------------------------|
| GO:0004197 | 6  | 25  | 4.51E-03 | Cysteine-type endopeptidase activity                                                          |
| GO:0005149 | 2  | 2   | 4.62E-03 | Interleukin-1 receptor binding                                                                |
| GO:0005536 | 3  | 5   | 2.72E-03 | Glucose binding                                                                               |
| GO:0043169 | 5  | 16  | 2.89E-03 | Cation binding                                                                                |
| GO:0016812 | 2  | 2   | 4.62E-03 | Hydrolase activity, acting on<br>Carbon-nitrogen (but not peptide) bonds,<br>in cyclic amides |
| GO:0008013 | 3  | 6   | 5.07E-03 | Beta-catenin binding                                                                          |
| GO:0004029 | 3  | 6   | 5.07E-03 | Aldehyde dehydrogenase (NAD) activity                                                         |
| GO:0016303 | 3  | 4   | 1.17E-03 | 1-phosphatidylinositol-3-kinase activity                                                      |
| GO:0015038 | 2  | 2   | 4.62E-03 | Glutathione disulfide oxidoreductase<br>activity                                              |
| GO:0046934 | 2  | 2   | 4.62E-03 | Phosphatidylinositol-4,5-bisphosphate<br>3-kinase activity                                    |
| GO:0045087 | 26 | 200 | 5.07E-04 | Innate immune response                                                                        |
| GO:0043066 | 32 | 212 | 7.23E-06 | Negative regulation of apoptotic process                                                      |
| GO:0006508 | 28 | 170 | 5.21E-06 | Proteolysis                                                                                   |
| GO:0006006 | 7  | 37  | 8.21E-03 | Glucose metabolic process                                                                     |
| GO:0070207 | 4  | 8   | 1.12E-03 | Protein homotrimerization                                                                     |
| GO:0044281 | 26 | 198 | 4.38E-04 | Small molecule metabolic process                                                              |
| GO:0007409 | 6  | 18  | 7.69E-04 | Axonogenesis                                                                                  |
| GO:0046777 | 13 | 94  | 6.34E-03 | Protein autophosphorylation                                                                   |
| GO:0002250 | 4  | 11  | 4.28E-03 | Adaptive immune response                                                                      |
| GO:0001816 | 4  | 9   | 1.88E-03 | Cytokine production                                                                           |
| GO:0071222 | 8  | 29  | 4.27E-04 | Cellular response to lipopolysaccharide                                                       |
| GO:0045080 | 3  | 7   | 8.28E-03 | Positive regulation of chemokine<br>biosynthetic process                                      |
| GO:0042493 | 16 | 133 | 9.36E-03 | Response to drug                                                                              |
| GO:0030168 | 15 | 111 | 4.52E-03 | Platelet activation                                                                           |
| GO:0002576 | 9  | 55  | 7.53E-03 | Platelet degranulation                                                                        |
| GO:0006935 | 5  | 21  | 9.49E-03 | Chemotaxis                                                                                    |
| GO:0071260 | 7  | 33  | 4.50E-03 | Cellular response to mechanical stimulus                                                      |

|            |   |    |          |                                                              |
|------------|---|----|----------|--------------------------------------------------------------|
| GO:0045078 | 3 | 6  | 5.07E-03 | Positive regulation of interferon-gamma biosynthetic process |
| GO:0006096 | 8 | 25 | 1.42E-04 | Glycolytic process                                           |
| GO:0005980 | 3 | 7  | 8.28E-03 | Glycogen catabolic process                                   |
| GO:0046686 | 5 | 14 | 1.52E-03 | Response to cadmium ion                                      |
| GO:0000281 | 3 | 7  | 8.28E-03 | Mitotic cytokinesis                                          |
| GO:0007160 | 7 | 26 | 1.12E-03 | Cell-matrix adhesion                                         |
| GO:0045780 | 3 | 7  | 8.28E-03 | Positive regulation of bone resorption                       |
| GO:0050435 | 3 | 5  | 2.72E-03 | Beta-amyloid metabolic process                               |
| GO:0007040 | 4 | 8  | 1.12E-03 | Lysosome organization                                        |
| GO:0007494 | 2 | 2  | 4.62E-03 | Midgut development                                           |
| GO:0060444 | 4 | 8  | 1.12E-03 | Branching involved in mammary gland duct morphogenesis       |
| GO:0030316 | 4 | 11 | 4.28E-03 | Osteoclast differentiation                                   |
| GO:0033628 | 3 | 7  | 8.28E-03 | Regulation of cell adhesion mediated by integrin             |
| GO:0002437 | 3 | 7  | 8.28E-03 | Inflammatory response to antigenic stimulus                  |
| GO:0032611 | 2 | 2  | 4.62E-03 | Interleukin-1 beta production                                |
| GO:0042346 | 4 | 11 | 4.28E-03 | Positive regulation of NF-kappaB import into nucleus         |
| GO:0003073 | 2 | 2  | 4.62E-03 | Regulation of systemic arterial blood pressure               |
| GO:0030207 | 3 | 5  | 2.72E-03 | Chondroitin sulfate catabolic process                        |
| GO:0045356 | 2 | 2  | 4.62E-03 | Positive regulation of interferon-alpha biosynthetic process |
| GO:0060740 | 3 | 6  | 5.07E-03 | Prostate gland epithelium morphogenesis                      |
| GO:0042733 | 4 | 9  | 1.88E-03 | Embryonic digit morphogenesis                                |
| GO:0061198 | 2 | 2  | 4.62E-03 | Fungiform papilla formation                                  |
| GO:0060789 | 3 | 4  | 1.17E-03 | Hair follicle placode formation                              |
| GO:0010042 | 2 | 2  | 4.62E-03 | Response to manganese ion                                    |
| GO:0071372 | 3 | 5  | 2.72E-03 | Cellular response to follicle-stimulating                    |

|            |    |      |          |                                                                                  |
|------------|----|------|----------|----------------------------------------------------------------------------------|
|            |    |      |          | hormone stimulus                                                                 |
| GO:0003420 | 2  | 2    | 4.62E-03 | Regulation of growth plate cartilage chondrocyte proliferation                   |
| GO:0070527 | 3  | 4    | 1.17E-03 | Platelet aggregation                                                             |
| GO:0014909 | 3  | 4    | 1.17E-03 | Smooth muscle cell migration                                                     |
| GO:0042117 | 2  | 2    | 4.62E-03 | Monocyte activation                                                              |
| GO:0010641 | 2  | 2    | 4.62E-03 | Positive regulation of platelet-derived growth factor receptor signaling pathway |
| GO:0050927 | 3  | 5    | 2.72E-03 | Positive regulation of positive chemotaxis                                       |
| GO:0035116 | 4  | 11   | 4.28E-03 | Embryonic hindlimb morphogenesis                                                 |
| GO:0032331 | 3  | 6    | 5.07E-03 | Negative regulation of chondrocyte differentiation                               |
| GO:0050790 | 3  | 4    | 1.17E-03 | Regulation of catalytic activity                                                 |
| GO:0051131 | 2  | 2    | 4.62E-03 | Chaperone-mediated protein complex assembly                                      |
| GO:0019953 | 2  | 2    | 4.62E-03 | Sexual reproduction                                                              |
| GO:0055118 | 2  | 2    | 4.62E-03 | Negative regulation of cardiac muscle contraction                                |
| GO:0048025 | 2  | 2    | 4.62E-03 | Negative regulation of mrna splicing, via spliceosome                            |
| GO:0009966 | 3  | 4    | 1.17E-03 | Regulation of signal transduction                                                |
|            |    |      |          | Canonical Wnt signaling pathway                                                  |
| GO:0061324 | 2  | 2    | 4.62E-03 | involved in positive regulation of cardiac outflow tract cell proliferation      |
| GO:0003344 | 2  | 2    | 4.62E-03 | Pericardium morphogenesis                                                        |
| GO:0005783 | 17 | 120  | 1.72E-03 | Endoplasmic reticulum                                                            |
| GO:0005829 | 97 | 1106 | 7.07E-04 | Cytosol                                                                          |
| GO:0005739 | 32 | 271  | 6.50E-04 | Mitochondrion                                                                    |
| GO:0005759 | 13 | 95   | 6.86E-03 | Mitochondrial matrix                                                             |
| GO:0000922 | 6  | 27   | 6.56E-03 | Spindle pole                                                                     |
| GO:0005794 | 20 | 176  | 7.63E-03 | Golgi apparatus                                                                  |

|    |            |    |     |          |                                                                                         |
|----|------------|----|-----|----------|-----------------------------------------------------------------------------------------|
|    | GO:0016020 | 17 | 122 | 2.03E-03 | Membrane                                                                                |
|    | GO:0009986 | 16 | 132 | 8.82E-03 | Cell surface                                                                            |
|    | GO:0005576 | 36 | 322 | 8.24E-04 | Extracellular region                                                                    |
|    | GO:0016021 | 31 | 306 | 6.27E-03 | Integral component of membrane                                                          |
|    | GO:0030027 | 8  | 47  | 9.02E-03 | Lamellipodium                                                                           |
|    | GO:0005615 | 33 | 327 | 5.35E-03 | Extracellular space                                                                     |
|    | GO:0005789 | 14 | 109 | 8.58E-03 | Endoplasmic reticulum membrane                                                          |
|    | GO:0036020 | 2  | 2   | 4.62E-03 | Endolysosome membrane                                                                   |
|    | GO:0030877 | 3  | 7   | 8.28E-03 | Beta-catenin destruction complex                                                        |
|    | GO:0036021 | 3  | 4   | 1.17E-03 | Endolysosome lumen                                                                      |
| MF | GO:0005524 | 65 | 537 | 5.79E-07 | ATP binding                                                                             |
|    | GO:0004674 | 17 | 129 | 3.46E-03 | Protein serine/threonine kinase activity                                                |
|    | GO:0009055 | 12 | 68  | 1.28E-03 | Electron carrier activity                                                               |
|    | GO:0004252 | 10 | 63  | 6.24E-03 | Serine-type endopeptidase activity                                                      |
|    | GO:0008201 | 9  | 55  | 7.53E-03 | Heparin binding                                                                         |
|    | GO:0008144 | 6  | 28  | 7.79E-03 | Drug binding                                                                            |
|    | GO:0005506 | 10 | 66  | 8.37E-03 | Iron ion binding                                                                        |
|    | GO:0016887 | 4  | 13  | 8.06E-03 | Atpase activity                                                                         |
|    | GO:0004222 | 7  | 34  | 5.28E-03 | Metalloendopeptidase activity                                                           |
|    | GO:0004716 | 4  | 8   | 1.12E-03 | Receptor signaling protein tyrosine kinase activity                                     |
|    | GO:0004197 | 6  | 25  | 4.51E-03 | Cysteine-type endopeptidase activity                                                    |
|    | GO:0005149 | 2  | 2   | 4.62E-03 | Interleukin-1 receptor binding                                                          |
|    | GO:0005536 | 3  | 5   | 2.72E-03 | Glucose binding                                                                         |
|    | GO:0043169 | 5  | 16  | 2.89E-03 | Cation binding                                                                          |
|    | GO:0016812 | 2  | 2   | 4.62E-03 | Hydrolase activity, acting on carbon-nitrogen (but not peptide) bonds, in cyclic amides |
|    | GO:0008013 | 3  | 6   | 5.07E-03 | Beta-catenin binding                                                                    |
|    | GO:0004029 | 3  | 6   | 5.07E-03 | Aldehyde dehydrogenase (NAD) activity                                                   |
|    | GO:0016303 | 3  | 4   | 1.17E-03 | 1-phosphatidylinositol-3-kinase activity                                                |
|    | GO:0015038 | 2  | 2   | 4.62E-03 | Glutathione disulfide oxidoreductase                                                    |

|    |            |    |     |                                                                 |
|----|------------|----|-----|-----------------------------------------------------------------|
|    |            |    |     | activity                                                        |
|    | GO:0046934 | 2  | 2   | 4.62E-03                                                        |
|    |            |    |     | Phosphatidylinositol-4,5-bisphosphate<br>3-kinase activity      |
| BP | GO:0045087 | 26 | 200 | 5.07E-04                                                        |
|    | GO:0043066 | 32 | 212 | 7.23E-06                                                        |
|    | GO:0006508 | 28 | 170 | 5.21E-06                                                        |
|    | GO:0006006 | 7  | 37  | 8.21E-03                                                        |
|    | GO:0070207 | 4  | 8   | 1.12E-03                                                        |
|    | GO:0044281 | 26 | 198 | 4.38E-04                                                        |
|    | GO:0007409 | 6  | 18  | 7.69E-04                                                        |
|    | GO:0046777 | 13 | 94  | 6.34E-03                                                        |
|    | GO:0002250 | 4  | 11  | 4.28E-03                                                        |
|    | GO:0001816 | 4  | 9   | 1.88E-03                                                        |
|    | GO:0071222 | 8  | 29  | 4.27E-04                                                        |
|    | GO:0045080 | 3  | 7   | 8.28E-03                                                        |
|    |            |    |     | Positive regulation of chemokine<br>biosynthetic process        |
|    | GO:0042493 | 16 | 133 | 9.36E-03                                                        |
|    | GO:0030168 | 15 | 111 | 4.52E-03                                                        |
|    | GO:0002576 | 9  | 55  | 7.53E-03                                                        |
|    | GO:0006935 | 5  | 21  | 9.49E-03                                                        |
|    | GO:0071260 | 7  | 33  | 4.50E-03                                                        |
|    | GO:0045078 | 3  | 6   | 5.07E-03                                                        |
|    |            |    |     | Positive regulation of interferon-gamma<br>biosynthetic process |
|    | GO:0006096 | 8  | 25  | 1.42E-04                                                        |
|    | GO:0005980 | 3  | 7   | 8.28E-03                                                        |
|    | GO:0046686 | 5  | 14  | 1.52E-03                                                        |
|    | GO:0000281 | 3  | 7   | 8.28E-03                                                        |
|    | GO:0007160 | 7  | 26  | 1.12E-03                                                        |
|    | GO:0045780 | 3  | 7   | 8.28E-03                                                        |
|    | GO:0050435 | 3  | 5   | 2.72E-03                                                        |
|    | GO:0007040 | 4  | 8   | 1.12E-03                                                        |
|    | GO:0007494 | 2  | 2   | 4.62E-03                                                        |
|    |            |    |     | Midgut development                                              |

|            |   |    |          |                                                                                  |
|------------|---|----|----------|----------------------------------------------------------------------------------|
| GO:0060444 | 4 | 8  | 1.12E-03 | Branching involved in mammary gland duct morphogenesis                           |
| GO:0030316 | 4 | 11 | 4.28E-03 | Osteoclast differentiation                                                       |
| GO:0033628 | 3 | 7  | 8.28E-03 | Regulation of cell adhesion mediated by integrin                                 |
| GO:0002437 | 3 | 7  | 8.28E-03 | Inflammatory response to antigenic stimulus                                      |
| GO:0032611 | 2 | 2  | 4.62E-03 | Interleukin-1 beta production                                                    |
| GO:0042346 | 4 | 11 | 4.28E-03 | Positive regulation of NF-kappaB import into nucleus                             |
| GO:0003073 | 2 | 2  | 4.62E-03 | Regulation of systemic arterial blood pressure                                   |
| GO:0030207 | 3 | 5  | 2.72E-03 | Chondroitin sulfate catabolic process                                            |
| GO:0045356 | 2 | 2  | 4.62E-03 | Positive regulation of interferon-alpha biosynthetic process                     |
| GO:0060740 | 3 | 6  | 5.07E-03 | Prostate gland epithelium morphogenesis                                          |
| GO:0042733 | 4 | 9  | 1.88E-03 | Embryonic digit morphogenesis                                                    |
| GO:0061198 | 2 | 2  | 4.62E-03 | Fungiform papilla formation                                                      |
| GO:0060789 | 3 | 4  | 1.17E-03 | Hair follicle placode formation                                                  |
| GO:0010042 | 2 | 2  | 4.62E-03 | Response to manganese ion                                                        |
| GO:0071372 | 3 | 5  | 2.72E-03 | Cellular response to follicle-stimulating hormone stimulus                       |
| GO:0003420 | 2 | 2  | 4.62E-03 | Regulation of growth plate cartilage chondrocyte proliferation                   |
| GO:0070527 | 3 | 4  | 1.17E-03 | Platelet aggregation                                                             |
| GO:0014909 | 3 | 4  | 1.17E-03 | Smooth muscle cell migration                                                     |
| GO:0042117 | 2 | 2  | 4.62E-03 | Monocyte activation                                                              |
| GO:0010641 | 2 | 2  | 4.62E-03 | Positive regulation of platelet-derived growth factor receptor signaling pathway |
| GO:0050927 | 3 | 5  | 2.72E-03 | Positive regulation of positive chemotaxis                                       |
| GO:0035116 | 4 | 11 | 4.28E-03 | Embryonic hindlimb morphogenesis                                                 |

|            |   |   |          |                                                                                                             |
|------------|---|---|----------|-------------------------------------------------------------------------------------------------------------|
| GO:0032331 | 3 | 6 | 5.07E-03 | Negative regulation of chondrocyte differentiation                                                          |
| GO:0050790 | 3 | 4 | 1.17E-03 | Regulation of catalytic activity                                                                            |
| GO:0051131 | 2 | 2 | 4.62E-03 | Chaperone-mediated protein complex assembly                                                                 |
| GO:0019953 | 2 | 2 | 4.62E-03 | Sexual reproduction                                                                                         |
| GO:0055118 | 2 | 2 | 4.62E-03 | Negative regulation of cardiac muscle contraction                                                           |
| GO:0048025 | 2 | 2 | 4.62E-03 | Negative regulation of mrna splicing, via spliceosome                                                       |
| GO:0009966 | 3 | 4 | 1.17E-03 | Regulation of signal transduction                                                                           |
| GO:0061324 | 2 | 2 | 4.62E-03 | Canonical Wnt signaling pathway involved in positive regulation of cardiac outflow tract cell proliferation |
| GO:0003344 | 2 | 2 | 4.62E-03 | Pericardium morphogenesis                                                                                   |

---



## References

1. Chan, W.M. & Consortium, U. The UniProt Knowledgebase (UniProtKB): a freely accessible, comprehensive and expertly curated protein sequence database. *Genet Res* **92**, 78-79 (2010).
2. Kawashima, S. et al. AAindex: amino acid index database, progress report 2008. *Nucleic acids research* **36**, D202-205 (2008).
3. Holland, R.C. et al. BioJava: an open-source framework for bioinformatics. *Bioinformatics* **24**, 2096-2097 (2008).
4. Altschul, S.F. et al. Gapped BLAST and PSI-BLAST: a new generation of protein database search programs. *Nucleic acids research* **25**, 3389-3402 (1997).
5. Hubbard, S.J. & Thornton, J.M. Naccess. *Computer Program, Department of Biochemistry and Molecular Biology, University College London* **2** (1993).
6. Joosten, R.P. et al. A series of PDB related databases for everyday needs. *Nucleic acids research* **39**, D411-419 (2011).
7. Andersen, P., Nielsen, M. & Lund, O. Prediction of residues in discontinuous B-cell epitopes using protein 3D structures. *Protein science : a publication of the Protein Society* **15**, 2558-2567 (2006).
8. Mihel, J., Sikic, M., Tomic, S., Jeren, B. & Vlahovicek, K. PSAIA - protein structure and interaction analyzer. *BMC structural biology* **8**, 21 (2008).
9. Ren, J., Liu, Q., Ellis, J. & Li, J. Tertiary structure-based prediction of conformational B-cell epitopes through B factors. *Bioinformatics* **30**, i264-273 (2014).
